# Supplementary material
Source: PubMed Central journal article supplement (PMC3759549)
Supplement: NIHMS480518-supplement-01.pdf [file NIHMS480518-supplement-01.pdf]

**TABLE E1.** Baseline characteristics of control subjects

|                                           | <b>Project Viva<br/>(n = 197)</b> | <b>Home Allergens<br/>(n = 53)</b> |
|-------------------------------------------|-----------------------------------|------------------------------------|
| Male sex, no. (%)                         | 92 (46.7)                         | 25 (47.2)                          |
| Age (y), mean (SD)                        | 7.9 (0.8)                         | 11.7 (0.5)                         |
| Height (cm), mean (SD)                    | 128.3 (7.1)                       | 150.3 (7.5)                        |
| Weight (kg), mean (SD)                    | 27.8 (5.8)                        | 42.8 (8.2)                         |
| BMI (%), median (IQR)                     | 61.8 (32.6-83.2)                  | 66.3 (32.1-80.8)                   |
| Race                                      |                                   |                                    |
| White, no. (%)                            | 148 (75.1)                        | 42 (79.2)                          |
| Black, no. (%)                            | 15 (9.6)                          | 5 (9.4)                            |
| Hispanic, no. (%)                         | 5 (2.5)                           | 2 (3.8)                            |
| Other, no. (%)                            | 29 (14.7)                         | 4 (7.5)                            |
| FEV <sub>1</sub> (L), mean (SD)           | 1.52 (0.27)                       | 2.44 (0.42)                        |
| FEV <sub>1</sub> (% predicted), mean (SD) | 99.6 (12.5)                       | 97.8 (11.0)                        |
| BDR (%), mean (SD)                        | 2.5 (8.9)                         | 3.4 (5.9)                          |

*BMI*, Body mass index.

**TABLE E2.** Characteristics of subjects who did and did not perform BDR in Project Viva and Home Allergens

|                             | Subjects with<br>BDR (n = 819) | Subjects without<br>BDR (n = 297) |
|-----------------------------|--------------------------------|-----------------------------------|
| <b>Project Viva</b>         |                                |                                   |
| Male sex, no. (%)           | 415 (50.7)                     | 144 (48.5)                        |
| Age (y), mean (SD)          | 8.0 (0.9)                      | 7.9 (0.8)                         |
| Height (cm), mean (SD)      | 129.1 (7.9)                    | 127.2 (7.5)                       |
| Weight (kg), mean (SD)      | 27.4 (8.6)                     | 27.6 (6.9)                        |
| BMI (%), median (IQR)       | 65.7 (40.2-85.9)               | 59.0 (34.3-83.6)                  |
| <b>Race</b>                 |                                |                                   |
| White, no. (%)              | 492 (67.1)                     | 175 (64.3)                        |
| Black, no. (%)              | 103 (14.1)                     | 43 (15.8)                         |
| Hispanic, no. (%)           | 24 (3.3)                       | 9 (3.3)                           |
| Other, no. (%)              | 114 (15.6)                     | 45 (16.5)                         |
| Ever had asthma, no. (%)    | 203 (24.8)                     | 50 (17.1)                         |
| Ever had wheezing, no. (%)  | 142 (18.0)                     | 36 (13.3)                         |
| Ever had eczema, no. (%)    | 212 (25.9)                     | 69 (23.6)                         |
| Ever had hay fever, no. (%) | 191 (23.4)                     | 71 (24.3)                         |
| IgE (U/mL), median (IQR)    | 7.9 (0.0-62.5)                 | 0.0 (0.0-47.1)                    |
|                             | Subjects with<br>BDR (n = 250) | Subjects without<br>BDR (n = 34)  |
| <b>Home Allergens</b>       |                                |                                   |
| Male sex, no. (%)           | 138 (55.2)                     | 23 (67.6)                         |
| Age (y), mean (SD)          | 11.8 (0.6)                     | 11.8 (0.7)                        |
| Height (cm), mean (SD)      | 151.5 (7.8)                    | 149.2 (7.7)                       |
| Weight (kg), mean (SD)      | 46.5 (12.0)                    | 42.1 (8.3)                        |
| BMI (%), median (IQR)       | 72.3 (40.8-88.0)               | 62.4 (34.6-79.8)                  |
| <b>Race</b>                 |                                |                                   |
| White, no. (%)              | 207 (82.8)                     | 30 (88.2)                         |
| Black, no. (%)              | 20 (8.0)                       | 2 (5.9)                           |
| Hispanic, no. (%)           | 7 (2.8)                        | 1 (2.9)                           |
| Other, no. (%)              | 16 (6.4)                       | 1 (2.9)                           |
| Ever had asthma, no. (%)    | 91 (36.4)                      | 10 (29.4)                         |
| Ever had wheezing, no. (%)  | 189 (75.6)                     | 21 (61.8)                         |
| Ever had eczema, no. (%)    | 63 (46.3)                      | 7 (41.2)                          |
| Ever had hay fever, no. (%) | 94 (69.1)                      | 12 (70.6)                         |

Percentages shown are relative to data available for that variable.

*BMI*, Body mass index.

**TABLE E3.** Characteristics of control subjects who did and did not perform the BDR test in Project Viva and Home Allergens

|                             | Control subjects<br>with BDR (n = 197) | Control subjects<br>without BDR<br>(n = 214) |
|-----------------------------|----------------------------------------|----------------------------------------------|
| <b>Project Viva</b>         |                                        |                                              |
| Male sex, no. (%)           | 92 (46.7)                              | 99 (46.3)                                    |
| Age (y), mean (SD)          | 7.9 (0.8)                              | 7.9 (0.8)                                    |
| Height (cm), mean (SD)      | 128.3 (7.1)                            | 127.9 (7.1)                                  |
| Weight (kg), mean (SD)      | 27.8 (5.8)                             | 27.6 (5.9)                                   |
| BMI (%), median (IQR)       | 61.8 (32.6-83.2)                       | 57.8 (31.1-83.2)                             |
| <b>Race</b>                 |                                        |                                              |
| White, no. (%)              | 148 (75.1)                             | 139 (70.2)                                   |
| Black, no. (%)              | 15 (9.6)                               | 27 (13.6)                                    |
| Hispanic, no. (%)           | 5 (2.5)                                | 3 (1.5)                                      |
| Other, no. (%)              | 29 (14.7)                              | 29 (14.6)                                    |
| Ever had eczema, no. (%)    | 35 (17.8)                              | 44 (20.6)                                    |
| Ever had hay fever, no. (%) | 23 (11.7)                              | 42 (19.6)                                    |
| IgE (U/mL), median (IQR)    | 10.6 (0.0-68.1)                        | 4.5 (0.0-57.1)                               |
|                             | Control subjects<br>with BDR (n = 53)  | Control subjects<br>without BDR<br>(n = 9)   |
| <b>Home Allergens</b>       |                                        |                                              |
| Male sex, no. (%)           | 25 (47.2)                              | 4 (44.4)                                     |
| Age (y), mean (SD)          | 11.7 (0.5)                             | 11.9 (0.8)                                   |
| Height (cm), mean (SD)      | 150.3 (7.5)                            | 147.4 (9.4)                                  |
| Weight (kg), mean (SD)      | 42.8 (8.2)                             | 42.8 (10.9)                                  |
| BMI (%), median (IQR)       | 66.3 (32.1,80.8)                       | 73.1 (32.6,80.2)                             |
| <b>Race</b>                 |                                        |                                              |
| White, no. (%)              | 42 (79.2)                              | 7 (77.8)                                     |
| Black, no. (%)              | 5 (9.4)                                | 1 (11.1)                                     |
| Hispanic, no. (%)           | 2 (3.8)                                | 0 (0.0)                                      |
| Other, no. (%)              | 4 (7.5)                                | 1 (11.1)                                     |
| Ever had eczema, no. (%)    | 13 (43.3)                              | 0 (0.0)                                      |
| Ever had hay fever, no. (%) | 7 (23.3)                               | 0 (0.0)                                      |

Percentages shown are relative to data available for that variable.

*BMI*, Body mass index.
